# Supplementary material for: Boosting photoelectrochemical water splitting: enhanced hole transport in BiVO 4 photoanodes via interfacial coupling
Source: Royal Society of Chemistry journal article supplement (doi:10.1039/d4cy01284d), 2024-12-06
Supplement: d4cy01284d1.pdf [file d4cy01284d1.pdf]

## Supplementary material

### **Boosting Photoelectrochemical Water Splitting: Enhanced Hole Transport in BiVO<sub>4</sub> Photoanodes via Interfacial Coupling**

Hairu Wang<sup>a</sup>, Yuying Bai<sup>a</sup>, Rongling Wang<sup>a</sup>, Yanan Fu<sup>a</sup>, Qiong, Mei<sup>c</sup>, Bo Bai<sup>a</sup>,

Qizhao Wang<sup>a,b,\*</sup>

<sup>a</sup> School of Water and Environment, Key Laboratory of Subsurface Hydrology and Ecological Effects in Arid Region of Ministry of Education, Chang'an University, Xi'an 710054, Shaanxi, China

<sup>b</sup> College of Chemistry and Chemical Engineering, Northwest Normal University, Lanzhou 730070, Gansu, China

<sup>c</sup> School of Land Engineering, Chang'an University, Xi'an 710054, Shaanxi, China

\*Corresponding author:

Qizhao Wang, E-mail: qzwang@chd.edu.cn, wangqizhao@163.com

## **Experimental Section**

### **Text S1. Materials**

$\text{Co}(\text{CH}_3\text{COO})_2 \cdot 4\text{H}_2\text{O}$ 、 $\text{Ni}(\text{NO}_3)_2 \cdot 6\text{H}_2\text{O}$ 、 $(\text{NH}_4)_2\text{Fe}(\text{SO}_4)_2$ 、 $\text{Bi}(\text{NO}_3)_3 \cdot 5\text{H}_2\text{O}$ 、  
KI、KOH and anhydrous ethanol were purchased from Sinopharm Chemical Reagent Co., Ltd. P-benzoquinone (99.0%) and  $\text{VO}(\text{acac})_2$  were obtained from Shanghai Macklin Biochemical Technology Co., boric acid ( $\text{H}_3\text{BO}_3$ ) and ammonia solution ( $\text{NH}_3 \cdot \text{H}_2\text{O}$ ) was obtained from Tianjin Damao Chemical Reagent Factory.

### **Text S2. Preparation of nanoporous $\text{BiVO}_4$ photoanodes**

$\text{BiVO}_4$  electrodes were prepared using a typical three-electrode electrodeposition method. First,  $\text{Bi}(\text{NO}_3)_3 \cdot 5\text{H}_2\text{O}$  (0.9701 g) was added to a solution (50 mL) containing 0.4 M KI (pH adjusted to 1.7). Next, 0.23 M p-benzoquinone ethanol solution (20 mL) was mixed with the above solution as the electrolyte used in the subsequent electrodeposition, in which a three-electrode system was used including a Pt counter electrode, an FTO glass working electrode, and an Ag/AgCl reference electrode. The BiOI membrane was obtained by fixing position of the CV electrode at a potential varying from -0.13 to 0 V, with a scanning rate of 5 mV/s. Then, the reddish brown BiOI membrane was obtained by washing with deionized water and dried. 180  $\mu\text{L}$  of 0.2 M  $\text{VO}(\text{acac})_2$  DMSO solution was added dropwise to the prepared BiOI membrane and annealed at 450 °C for 2 h at a heating rate of 2 °C/min. Finally, the samples were immersed in 1.0 M NaOH solution to remove excess  $\text{V}_2\text{O}_5$ , then rinsed with distilled water and dried in an oven to obtain pure  $\text{BiVO}_4$  electrode materials.

### **Text S3. Materials characterization**

The microstructure of the samples was characterized by scanning electron microscopy (SEM, Sigma 300, ZEISS) and transmission electron microscopy (TEM, JEM-F200, JEOL). The elemental distribution of the samples was analyzed by energy spectrometry (EDS). X-ray diffraction (XRD) was recorded by Rigaku (D/max-III B, Japan) using Cu K $\alpha$  as a radiation source. X-ray photoelectron spectroscopy (XPS) analysis of all samples was performed by an energy spectrometer (Thermo Scientific K-Alpha). The samples were characterized by UV-vis diffuse reflectance spectroscopy (UV-vis DRS) using a UV-vis spectrophotometer (U3010). The charge separation efficiency was analyzed by photoluminescence spectroscopy (PL, Hitachi F-4500).

#### **Text S4. PEC measurements**

PEC performance of photoanodes was evaluated in a standard three-electrode system (CHI 660e, Shanghai Chenhua Instruments Co., Ltd., China), containing photoanodes as working electrode, Ag/AgCl electrode (3.5 M KCl) as the reference electrode, and platinum as the counter electrode. A xenon lamp with an AM 1.5 G filter was used as the light source, and the light intensity was corrected to 100 mW cm<sup>-2</sup> using a photopower meter. The PEC performance of the samples was evaluated in a rectangular quartz reactor (5 cm  $\times$  5 cm  $\times$  7 cm) using aqueous potassium borate (KBi, 1.0 M, pH = 9.5) as the electrolyte. Linear scanning voltammetry (LSV) was performed at a scan rate of 50 mV s<sup>-1</sup> in a voltage window of -0.6 ~ 1.0 V vs. Ag/AgCl. Electrochemical impedance spectroscopy (EIS) was performed in the frequency range of 0.1 Hz to 100 kHz with 1.2 V vs. RHE as the initial voltage.

Incident photoelectric conversion efficiency (IPCE) measurements were performed at 1.23 V vs. RHE using a monochromator (71 SWS, Beijing Porphyry Technology Co., Ltd.) under AM 1.5G illumination. The precipitation of photoelectrochemical H<sub>2</sub> and O<sub>2</sub> was studied in 1.0 M KBi after 30 min of saturation with N<sub>2</sub> gas. Measurements were carried out by gas chromatography (GC-9560, Shanghai Huayi Chromatography Technology Co., Ltd.) based on standard H<sub>2</sub> and O<sub>2</sub> emission curves. All potentials were calibrated to the reversible hydrogen electrode (RHE) using the following equation.

$$E_{\text{vs. RHE}} = E_{\text{vs. Ag/AgCl}} + 0.059 \times \text{pH}$$

#### **Text S5. Calculation of IPCE**

Incident photon-to-current efficiency (IPCE) values were calculated using following equation:

$$IPCE(\%) = \frac{J \times 1240}{\lambda \times P_{\text{light}}} \times 100\% \quad (1)$$

Where J presents the photocurrent density (mA·cm<sup>-2</sup>) obtained from the electrochemical workstation. λ and P<sub>light</sub> are the incident light wavelength (nm) and the power density obtained at a specific wavelength (mW·cm<sup>-2</sup>), respectively.

#### **Text S6. Calculation of APCE**

Absorption photon-current efficiency (APCE) can be calculated by the following equation:

$$APCE(\%) = IPCE(\%) \times LHE \quad (2)$$

where LHE = 1 - 10<sup>-A</sup>, A is the absorbance according to the UV-vis spectrum.

#### **Text S7. Calculation of ABPE**

Applied bias photon-to-current efficiency (ABPE) can be calculated using the

following equation:

$$ABPE(\%) = \frac{J \times (1.23 - V_b)}{P} \times 100\% \quad (3)$$

where J is the photocurrent density ( $\text{mA} \cdot \text{cm}^{-2}$ ) obtained from the electrochemical workstation.  $V_b$  refers to the applied bias versus RHE (V), and P is the total light intensity of AM 1.5 G ( $100 \text{ mW} \cdot \text{cm}^{-2}$ ).

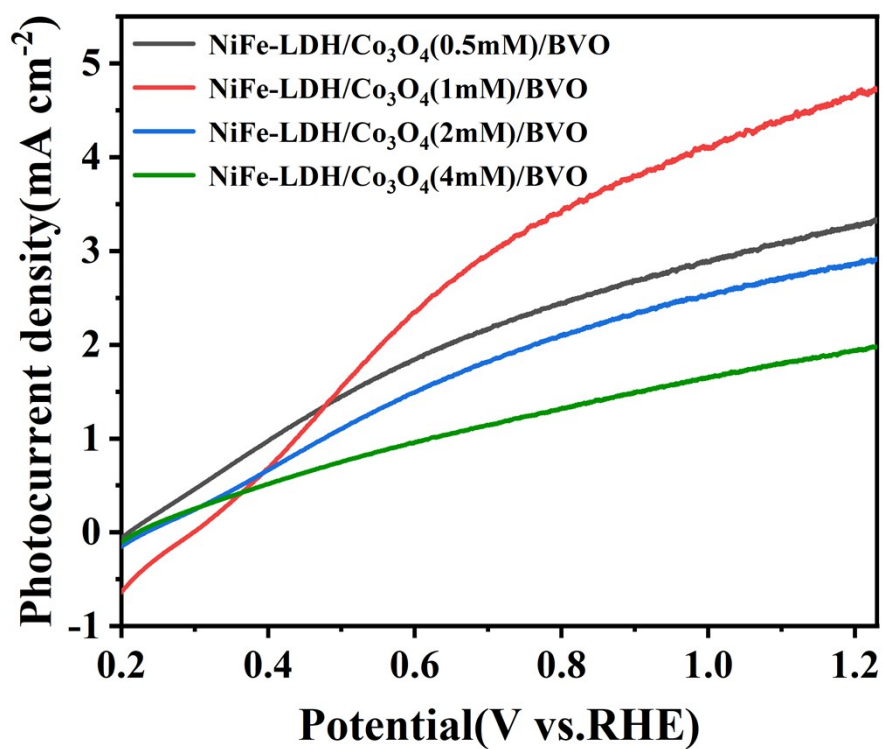

S1. LSV curves of NiFe-LDH/Co<sub>3</sub>O<sub>4</sub>/BiVO<sub>4</sub> photoanodes at different cobalt contents in 1.0M KBi electrolyte (pH=9.5) under AM 1.5 G illumination (100 mW cm<sup>-2</sup>).

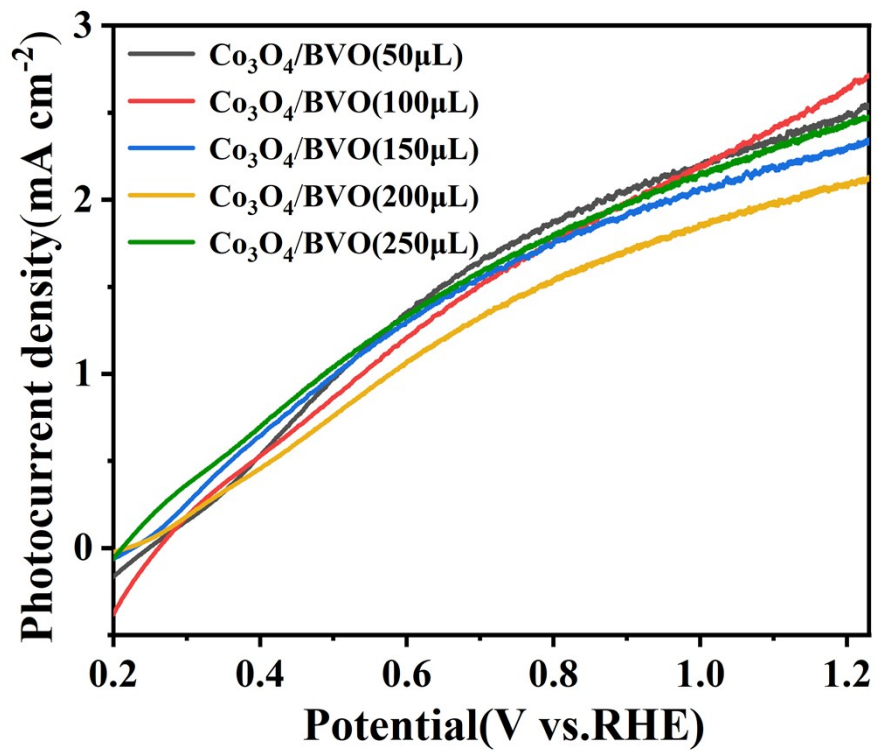

S2. LSV curves of NiFe-LDH/Co<sub>3</sub>O<sub>4</sub>/BiVO<sub>4</sub> photoanodes at different Co<sub>3</sub>O<sub>4</sub> loadings in 1.0 M KBi electrolyte (pH=9.5) under AM 1.5 G illumination (100 mW cm<sup>-2</sup>).

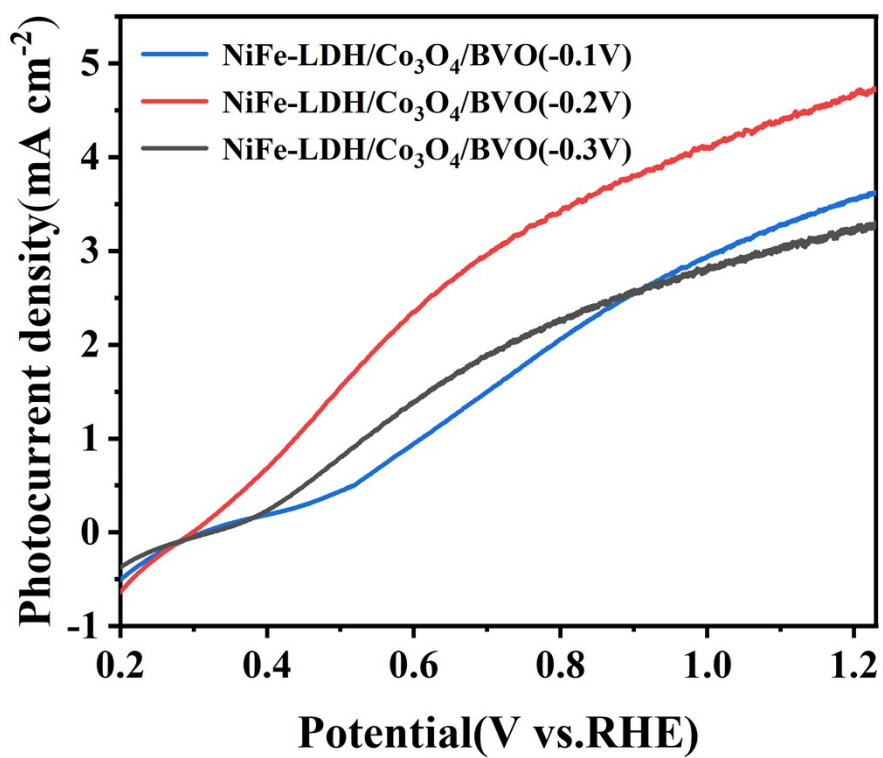

S3. LSV curves of NiFe-LDH in NiFe-LDH/Co<sub>3</sub>O<sub>4</sub>/BiVO<sub>4</sub> photoanodes with different deposition voltages.



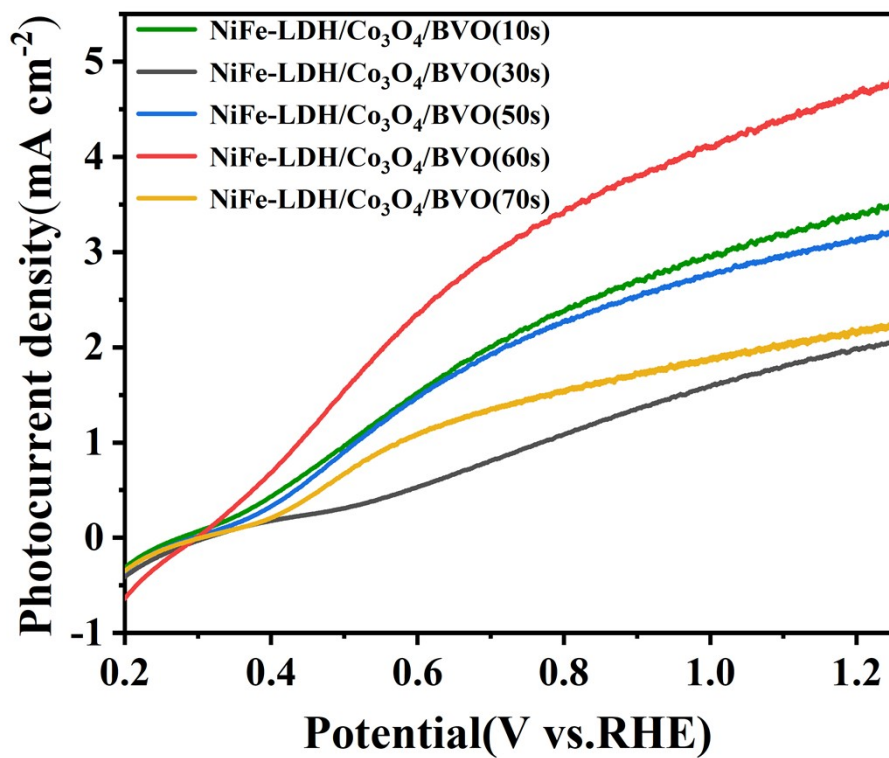

S4. LSV curves of NiFe-LDH in NiFe-LDH/Co<sub>3</sub>O<sub>4</sub>/BiVO<sub>4</sub> photoanodes with different deposition time.

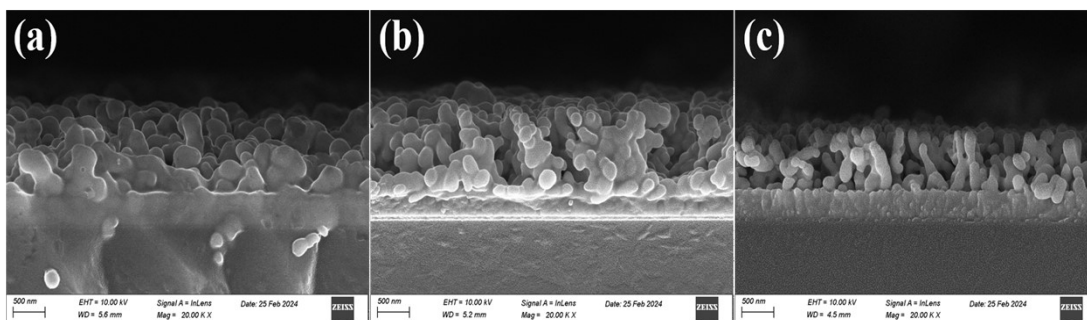

S5. SEM cross-sectional images of (a) BiVO<sub>4</sub>, (b) Co<sub>3</sub>O<sub>4</sub>/BiVO<sub>4</sub>, and (c) NiFe-LDH/Co<sub>3</sub>O<sub>4</sub>/BiVO<sub>4</sub>

films.

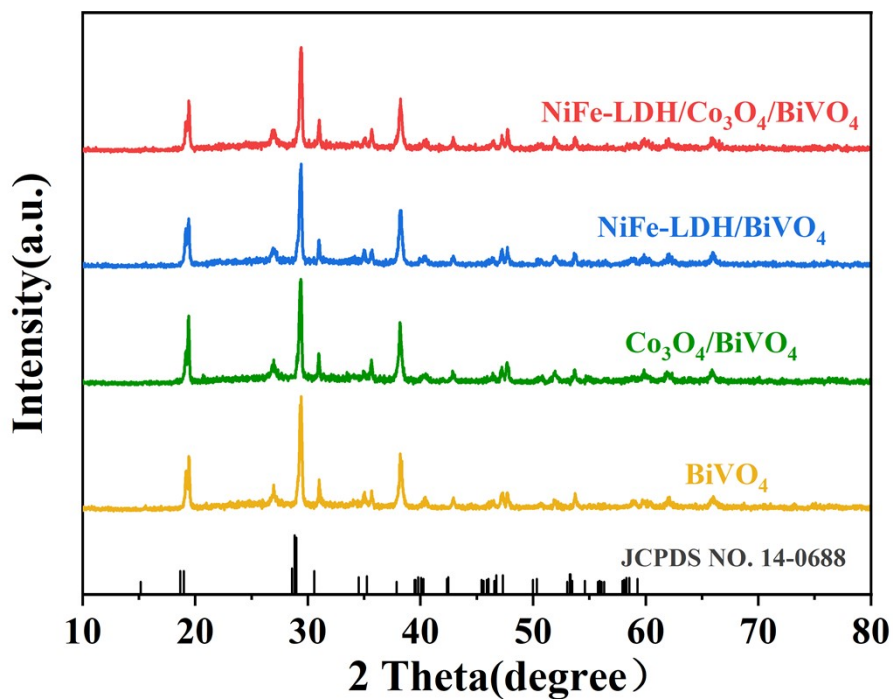

S6. XRD pattern of  $\text{BiVO}_4$ ,  $\text{Co}_3\text{O}_4/\text{BiVO}_4$ ,  $\text{NiFe-LDH}/\text{BiVO}_4$  and  $\text{NiFe-LDH}/\text{Co}_3\text{O}_4/\text{BiVO}_4$ .

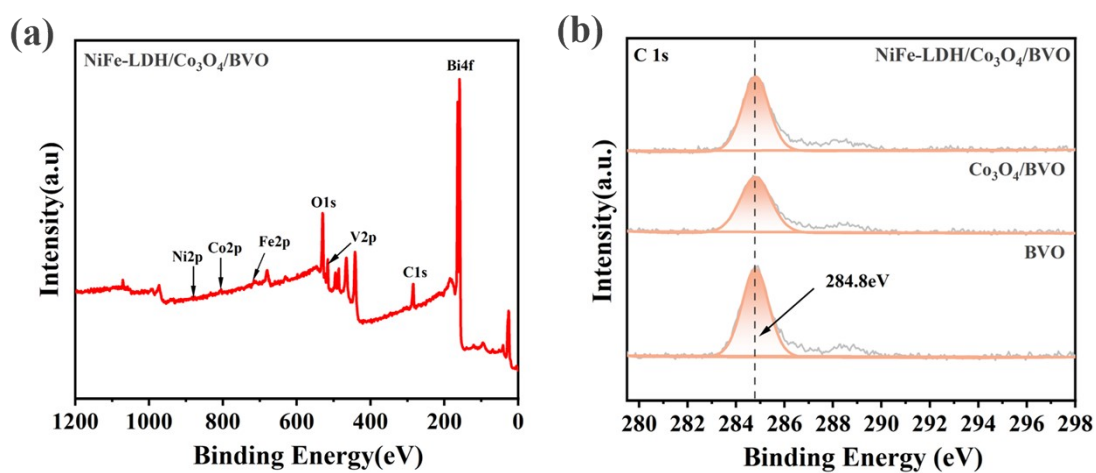

S7. The XPS spectrum of (a) survey and (b) C 1s.

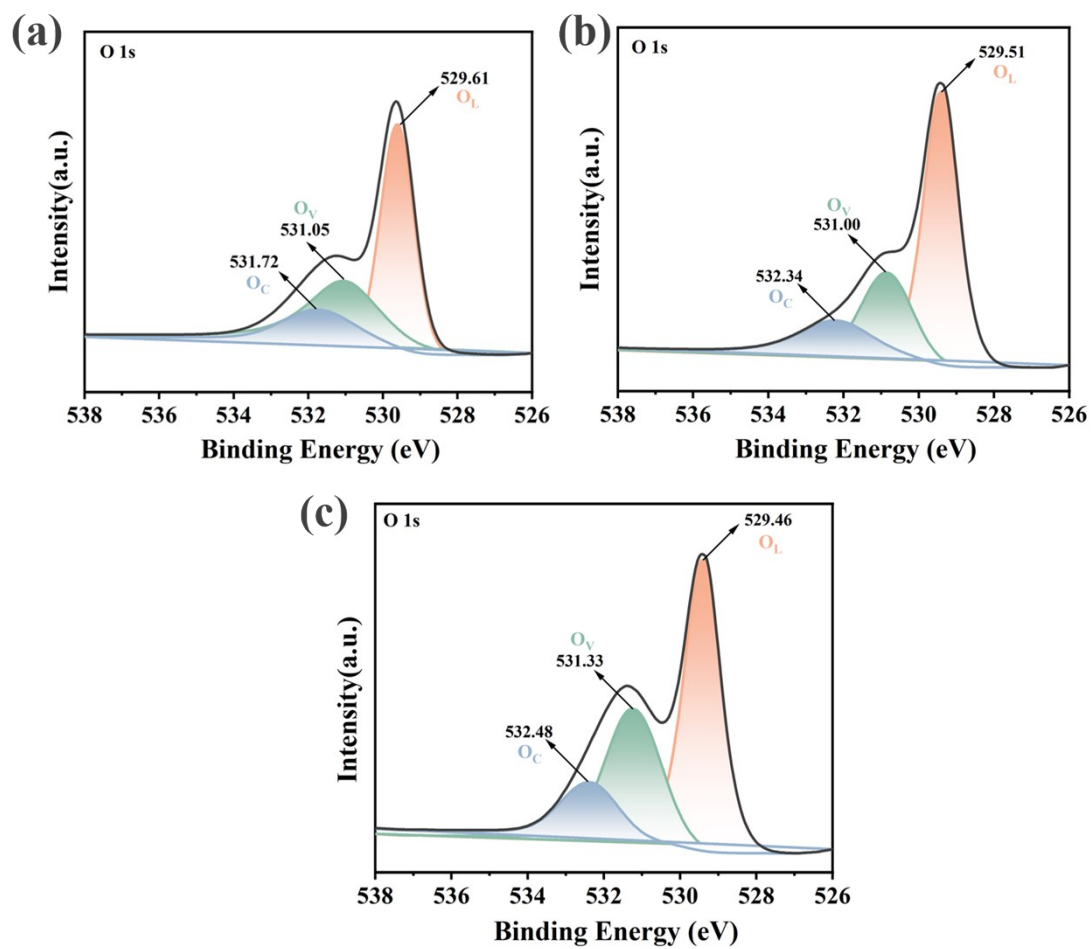

S8. The XPS O 1s spectrum of  $\text{BiVO}_4$ ,  $\text{Co}_3\text{O}_4/\text{BiVO}_4$  and  $\text{NiFe-LDH}/\text{Co}_3\text{O}_4/\text{BiVO}_4$ .

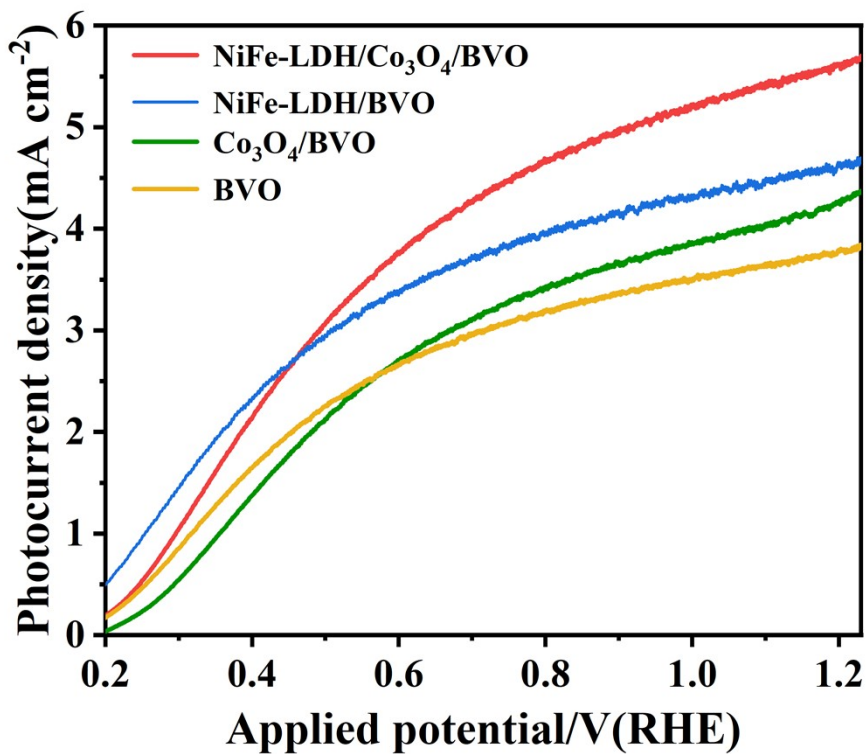

S9. LSV curves in the presence of 1 M Na<sub>2</sub>SO<sub>3</sub> with a scan rate of 50 mV s<sup>-1</sup>.

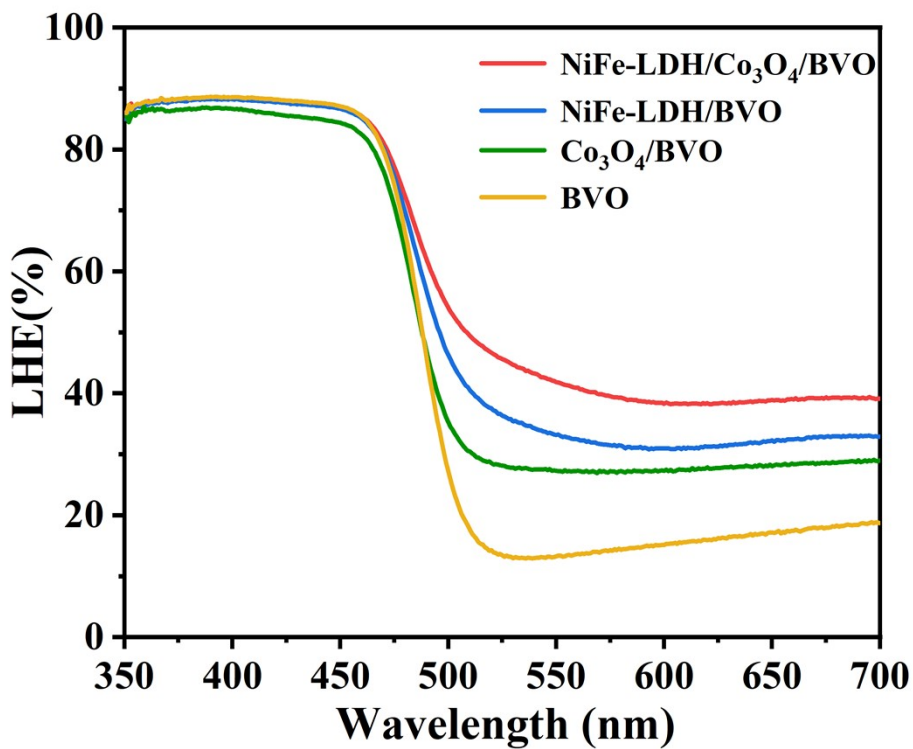

S10. LHE (Light harvesting efficiency) of all samples.

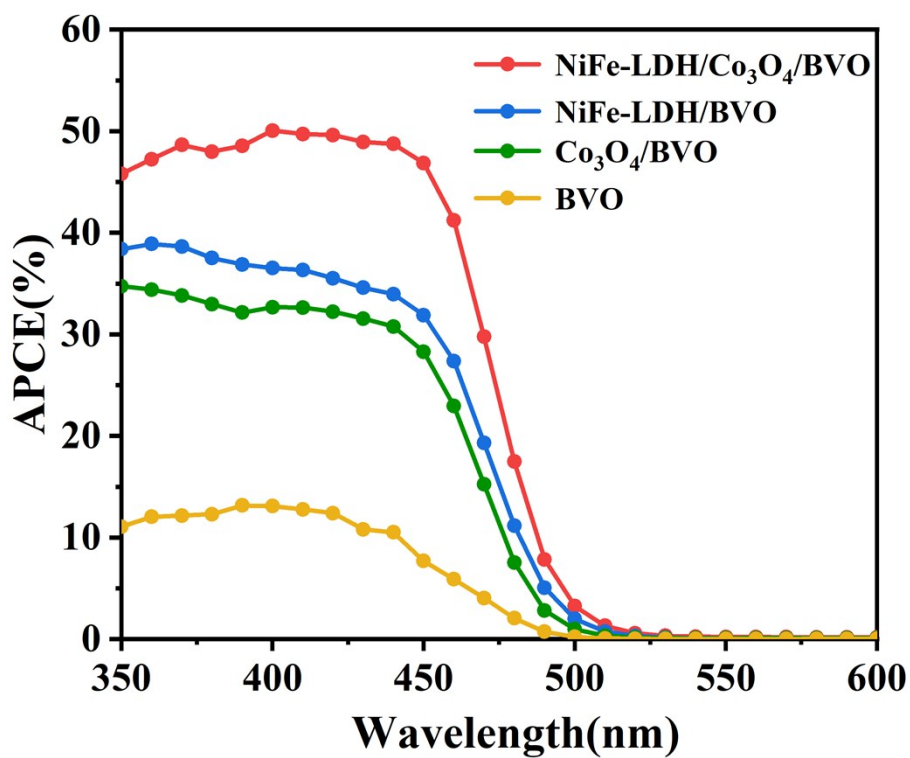

S11. APCE (absorption photon-current efficiency) of all samples.

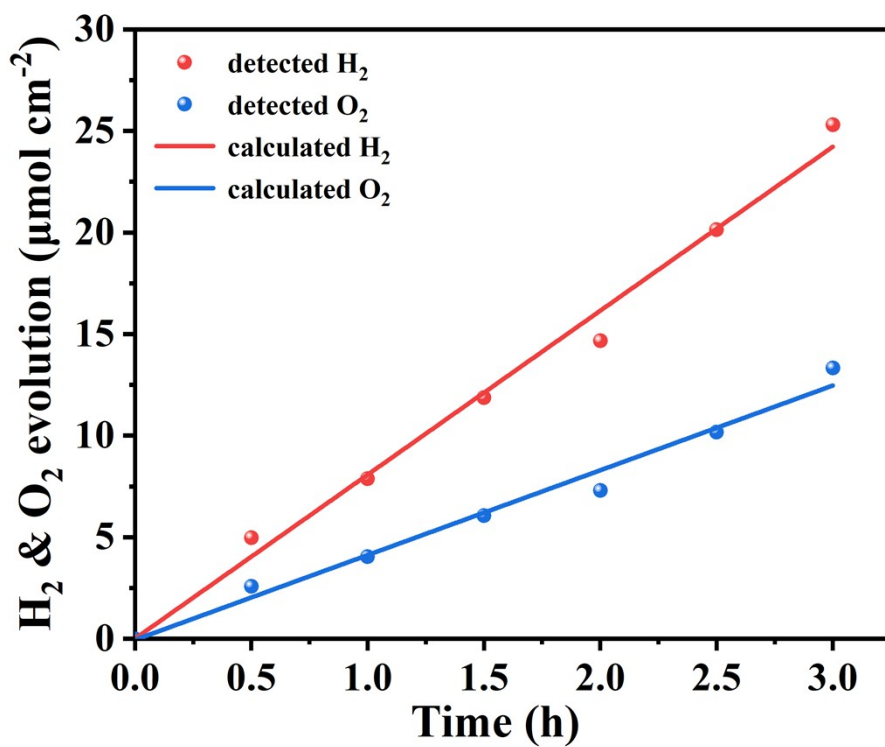

S12. H<sub>2</sub> and O<sub>2</sub> evolution of BiVO<sub>4</sub> photoanode at 1.23V vs. RHE under AM1.5G illumination.

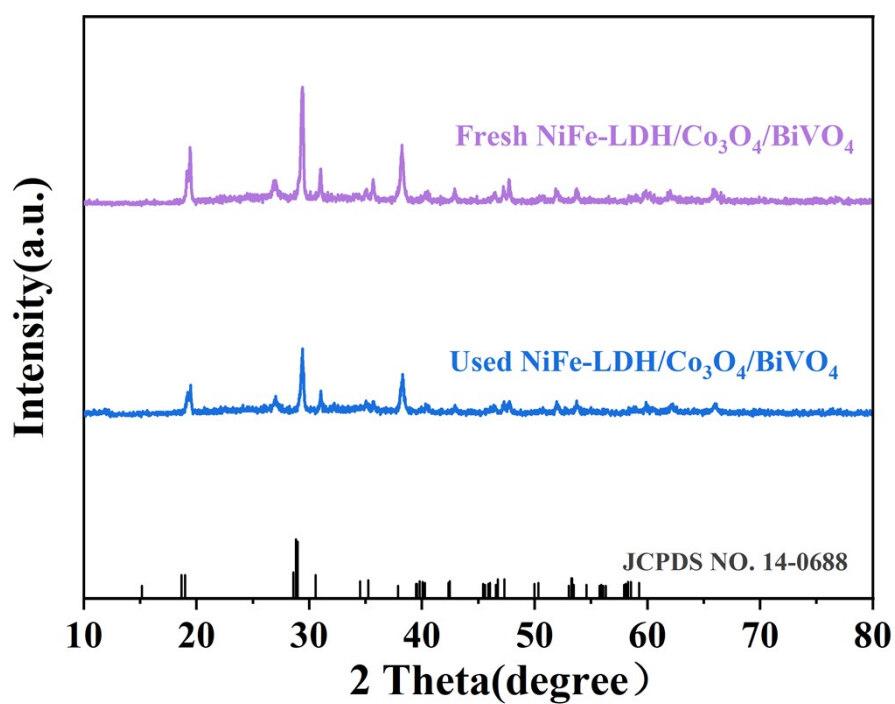

S13. XRD patterns of NiFe-LDH/Co<sub>3</sub>O<sub>4</sub>/BiVO<sub>4</sub> photoanode before and after PEC measurements.

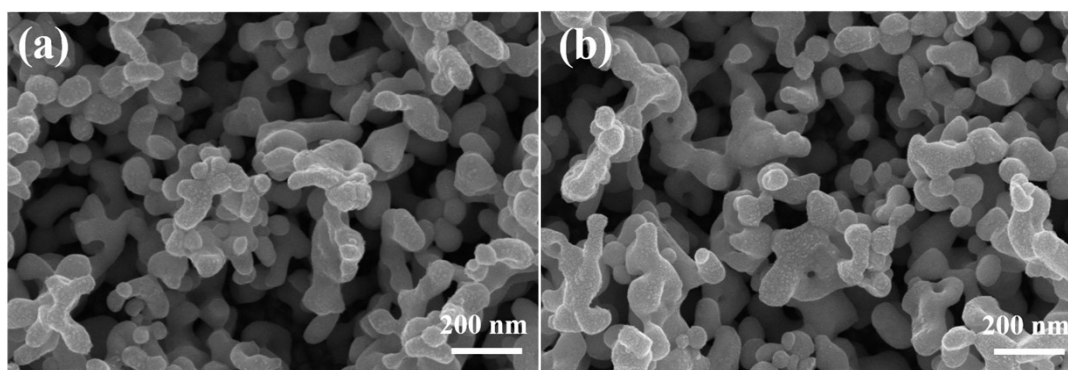

S14. SEM images of a NiFe-LDH/Co<sub>3</sub>O<sub>4</sub>/BiVO<sub>4</sub> film before (a) and after (b) the PEC measurements.

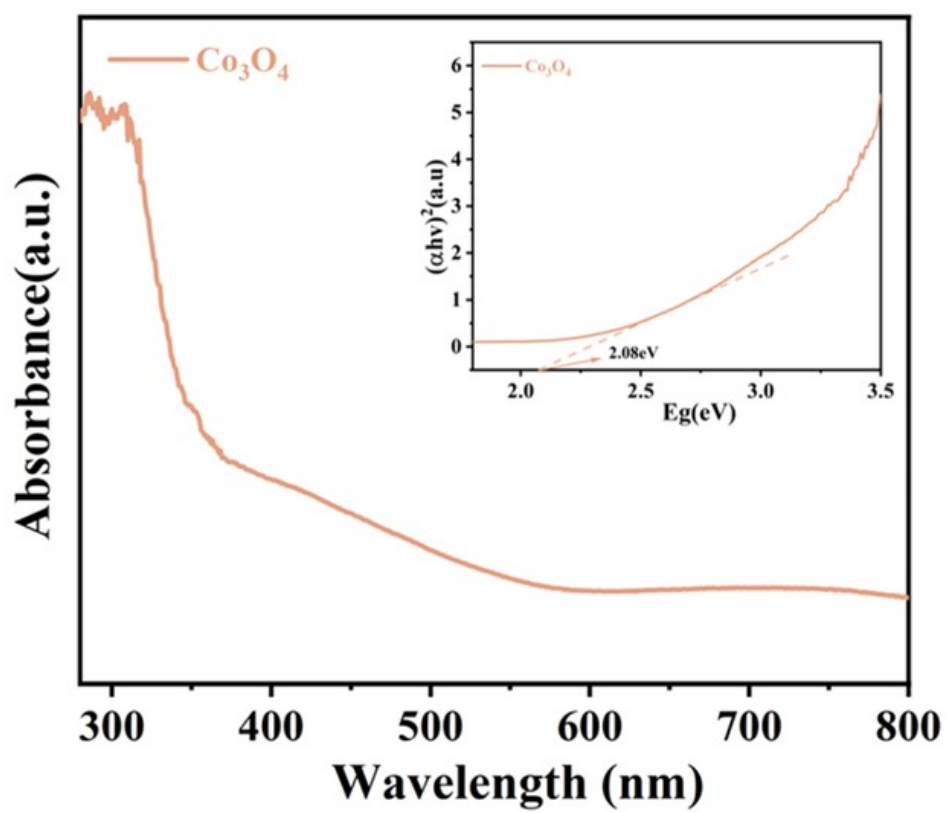

S15. UV-vis DRS spectra of  $\text{Co}_3\text{O}_4$  along with its estimated band gap energy.

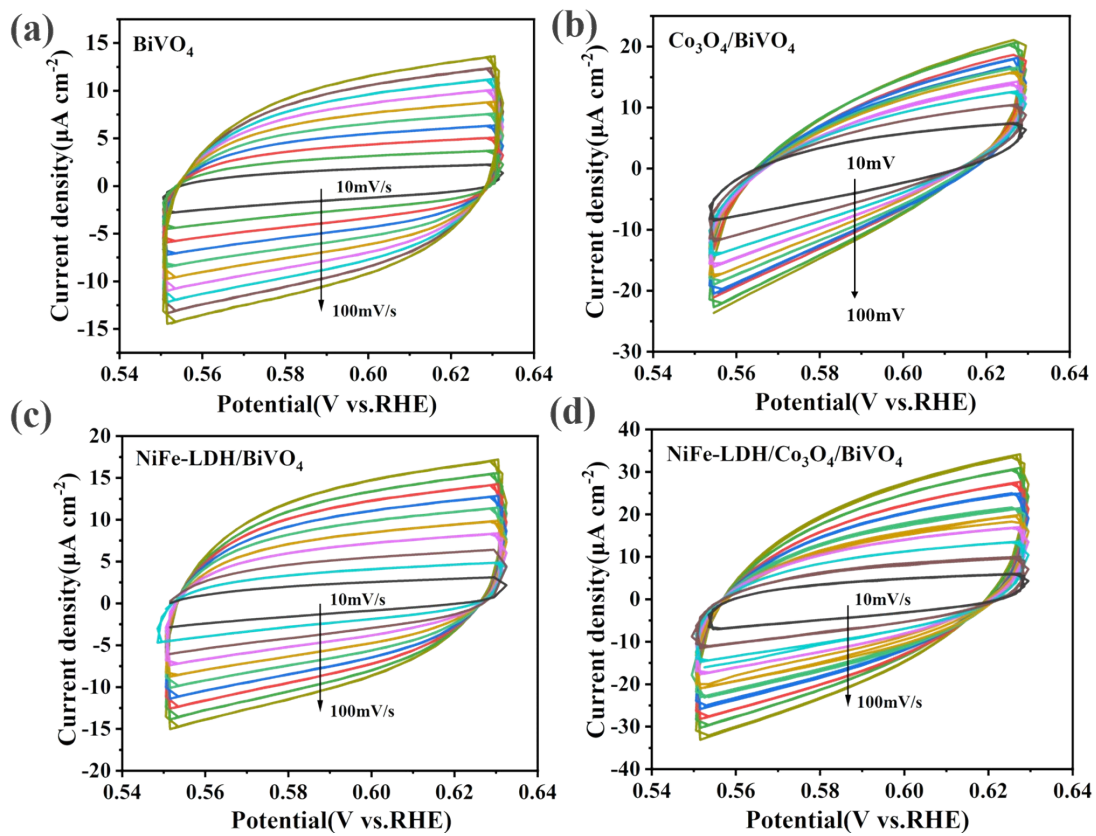

**S16.** Cyclic Voltammetry (CV) tests at different scanning rates of 10 ~ 100  $\text{mV s}^{-1}$

for (a)  $\text{BiVO}_4$ , (b)  $\text{Co}_3\text{O}_4/\text{BiVO}_4$ , (c)  $\text{NiFe-LDH}/\text{BiVO}_4$  and (d)  $\text{NiFe-LDH}/\text{Co}_3\text{O}_4/\text{BiVO}_4$ .



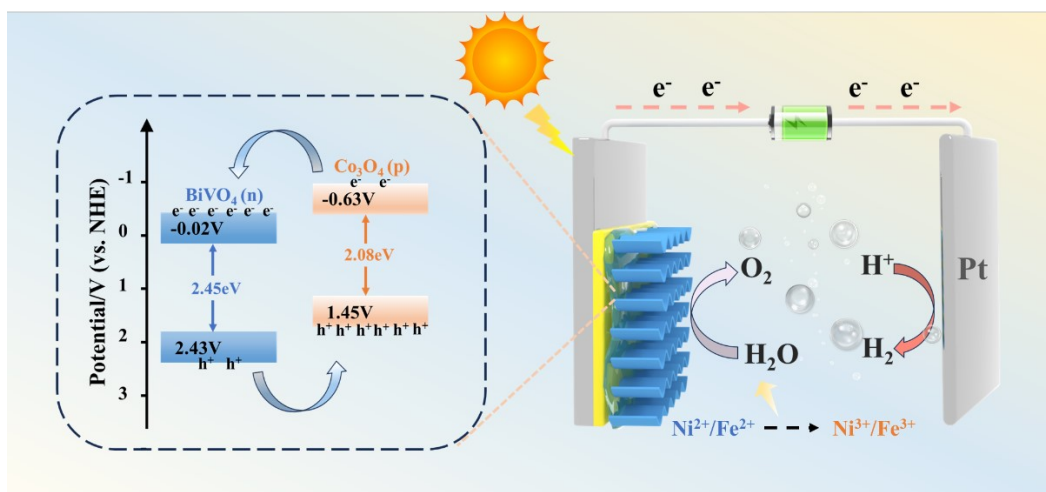

S17. Energy band alignment diagram of  $\text{Co}_3\text{O}_4/\text{BiVO}_4$ .

**Table S1. Comparison of PEC performance of reported  $\text{BiVO}_4$  photoanodes at 1.23V vs. RHE**

| Photoelectrode                                               | Reaction conditions                        | Photocurrent                 | $\text{H}_2/\text{O}_2$                                                                  | Ref.      |
|--------------------------------------------------------------|--------------------------------------------|------------------------------|------------------------------------------------------------------------------------------|-----------|
| NiFe-LDH/ $\text{Co}_3\text{O}_4/\text{BiVO}_4$              | 1.0 M KBi<br>AM 1.5G                       | 4.7 $\text{mA}/\text{cm}^2$  | 55.7 $\mu\text{mol}/\text{h}$ $\text{H}_2$<br>27.5 $\mu\text{mol}/\text{h}$ $\text{O}_2$ | This work |
| $\text{BiVO}_4/\text{NiFeOOH}/\text{Co-Pi}$                  | 0.5 M $\text{Na}_2\text{SO}_4$<br>AM 1.5 G | 2.03 $\text{mA}/\text{cm}^2$ | 7.0 $\mu\text{mol}/\text{h}$ $\text{H}_2$<br>3.6 $\mu\text{mol}/\text{h}$ $\text{O}_2$   | [1]       |
| $\text{Ni}(\text{OH})_2/\text{Cl-BiVO}_4$                    | 0.5 M $\text{K}_3\text{BO}_3$<br>AM 1.5 G  | 4.33 $\text{mA}/\text{cm}^2$ | 34.1 $\mu\text{mol}/\text{h}$ $\text{H}_2$<br>16.5 $\mu\text{mol}/\text{h}$ $\text{O}_2$ | [2]       |
| $\text{BiVO}_4/\text{BiOBr}$                                 | 0.5 M $\text{Na}_2\text{SO}_4$<br>AM 1.5 G | 2.69 $\text{mA}/\text{cm}^2$ | -                                                                                        | [3]       |
| $\text{BiVO}_4/\text{Mn-NiOOH}$                              | 0.5M $\text{Na}_2\text{SO}_4$<br>AM 1.5 G  | 2.41 $\text{mA}/\text{cm}^2$ | -                                                                                        | [4]       |
| $\text{BiVO}_4/\text{Al}_2\text{O}_3(\text{a})/\text{FeOOH}$ | 1.0 M $\text{Na}_2\text{SO}_3$<br>AM 1.5 G | 3.8 $\text{mA}/\text{cm}^2$  | -                                                                                        | [5]       |
| $\text{Nd}:\text{BiVO}_4@\text{NiCo-LDH}$                    | 0.5M $\text{Na}_2\text{SO}_4$<br>AM 1.5 G  | 4.1 $\text{mA}/\text{cm}^2$  | -                                                                                        | [6]       |
| $\text{FeOOH}/\text{Ti}:\text{BiVO}_4$                       | 0.2 M $\text{Na}_2\text{SO}_4$<br>AM 1.5 G | 3.99 $\text{mA}/\text{cm}^2$ | 31.6 $\mu\text{mol}/\text{h}$ $\text{H}_2$<br>15.5 $\mu\text{mol}/\text{h}$ $\text{O}_2$ | [7]       |

1. Fang, G.; Liu, Z.; Han, C., Enhancing the PEC water splitting performance of BiVO<sub>4</sub> co-modifying with NiFeOOH and Co-Pi double layer cocatalysts. *Applied Surface Science* **2020**, *515*, 146095.
2. Zhang, J.; Wei, X.; Zhao, J.; Zhang, Y.; Wang, L.; Huang, J.; She, H.; Wang, Q., Electronegative Cl<sup>-</sup> modified BiVO<sub>4</sub> photoanode synergized with nickel hydroxide cocatalyst for high-performance photoelectrochemical water splitting. *Chemical Engineering Journal* **2023**, *454*, 140081.
3. Shuai, L.; Tian, L.; Huang, X.; Dou, J.; Yu, J.; Chen, X., Enhanced charge carrier separation and stable photoelectrochemical water splitting via a high-performance BiVO<sub>4</sub>/BiOBr Type-II heterojunction. *International Journal of Hydrogen Energy* **2024**, *88*, 19-28.
4. Soundarya Mary, A.; Murugan, C.; Mahendiran, D.; Murugan, P.; Pandikumar, A., Investigation of Mn incorporation into NiOOH electrocatalyst loaded on BiVO<sub>4</sub> photoanode for enhanced photoelectrochemical water splitting: Experimental and theoretical approach. *Materials Today Energy* **2024**, *41*, 101541.
5. Yang, J.; Tao, Z.; Zhao, Q.; Li, J.; Liu, G., Synergistic effect of FeOOH cocatalyst and Al<sub>2</sub>O<sub>3</sub> passivation layer on BiVO<sub>4</sub> photoanode for enhanced photoelectrochemical water oxidation. *Journal of Alloys and Compounds* **2025**, *1010*, 177461.
6. Wang, M.; Wu, L.; Geng, L.; Gao, L.; Ge, J.; Niu, H.; Li, H.; Jin, J., Bifunctional NiCo-LDH cocatalyst with hole extraction and high catalytic activity for boosting photoelectrochemical water oxidation of Nd doped BiVO<sub>4</sub> photoanode. *Journal of Alloys and Compounds* **2024**, *987*, 174183.
7. Wang, J.; Bai, J.; Zhang, Y.; Li, L.; Zhou, C.; Zhou, T.; Li, J.; Zhu, H.; Zhou, B., Unconventional Substitution for BiVO<sub>4</sub> to Enhance Photoelectrocatalytic Performance by Accelerating Polaron Hopping. *ACS Applied Materials & Interfaces* **2023**, *15* (11), 14359-14368.
